# Supplementary material for: Patterning of hydrophobic three-dimensional carbon nanotube architectures by a pattern transfer approach
Source: Royal Society of Chemistry journal article supplement (doi:10.1039/c0nr00203h), 2010-01-01
Supplement: c0nr00203h.pdf [file c0nr00203h.pdf]

## Electronic Supplementary Information

### **Patterning of hydrophobic three-dimensional carbon nanotube architectures by a pattern transfer approach**

*Jia-Qi Huang, Qiang Zhang, Meng-Qiang Zhao, Guang-Hui Xu, Fei Wei\**

Beijing Key Laboratory of Green Chemical Reaction Engineering and Technology,  
Department of Chemical Engineering, Tsinghua University, Beijing 100084, China

---

\* Corresponding authors. Fax: +86-10-6277-2051;  
E-mail addresses: wf-dce@tsinghua.edu.cn (F. Wei).

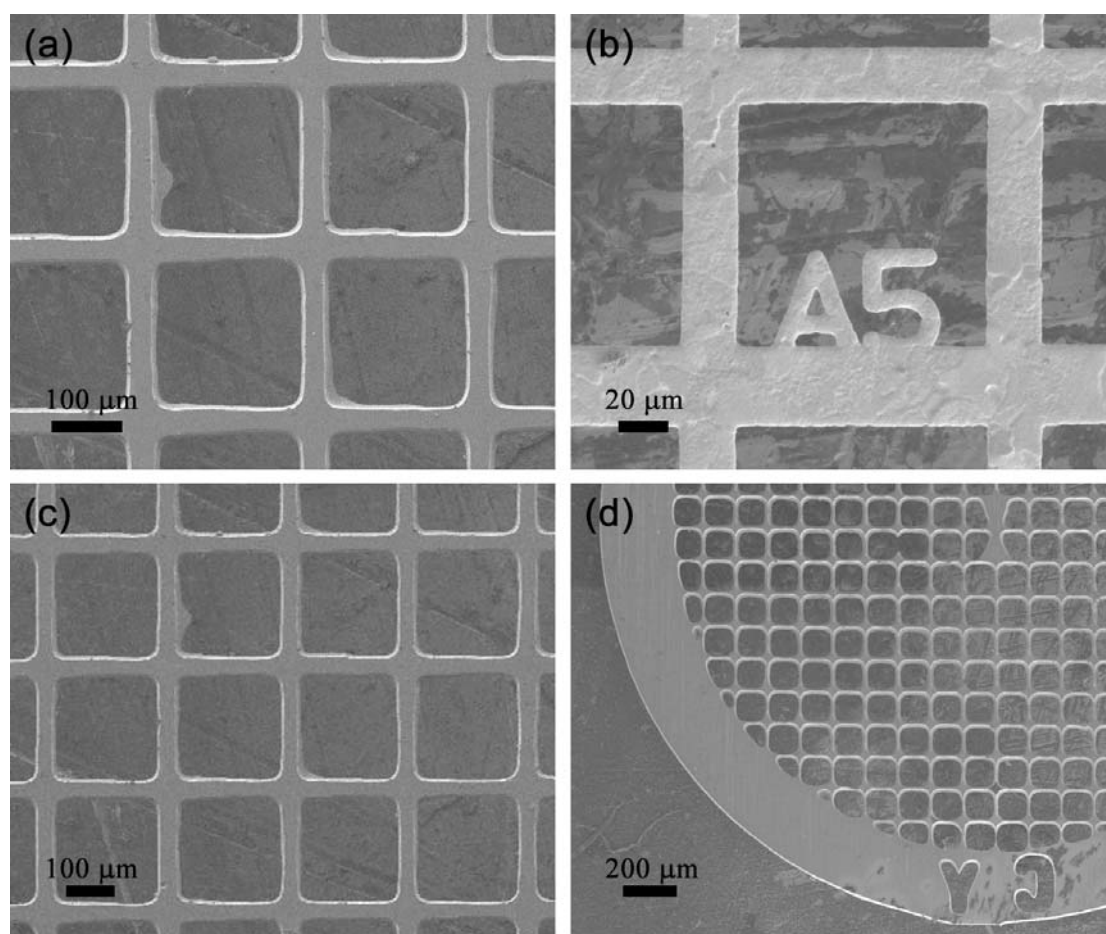

**Fig. S1** The SEM images of micro grid masks corresponded to the obtained CNT architectures in Fig. 1a, 1b and Fig. 3a, 3b.

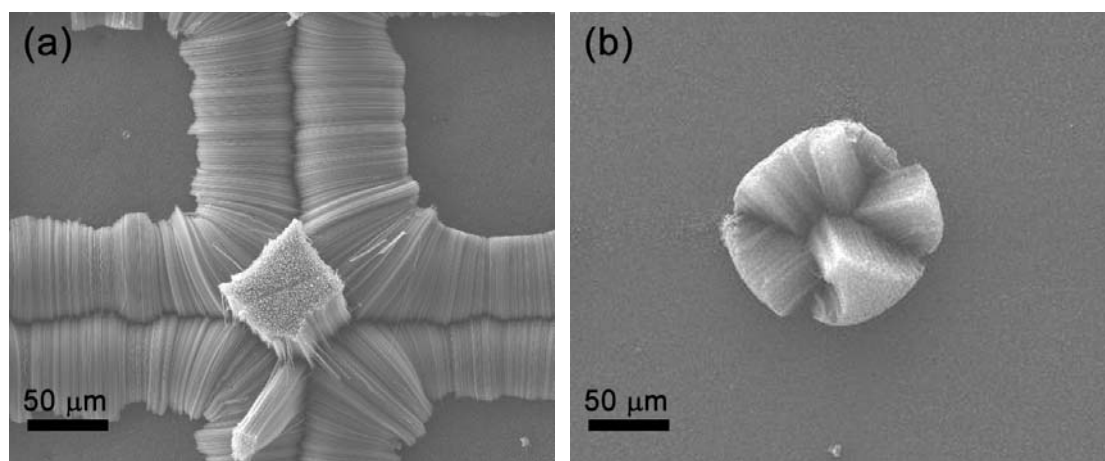

**Fig. S2** (a) The enlarged image of Fig. 1a and (b) the enlarged image of Fig. 3a, showing the detailed morphology of the multi-directional growth of CNT arrays.

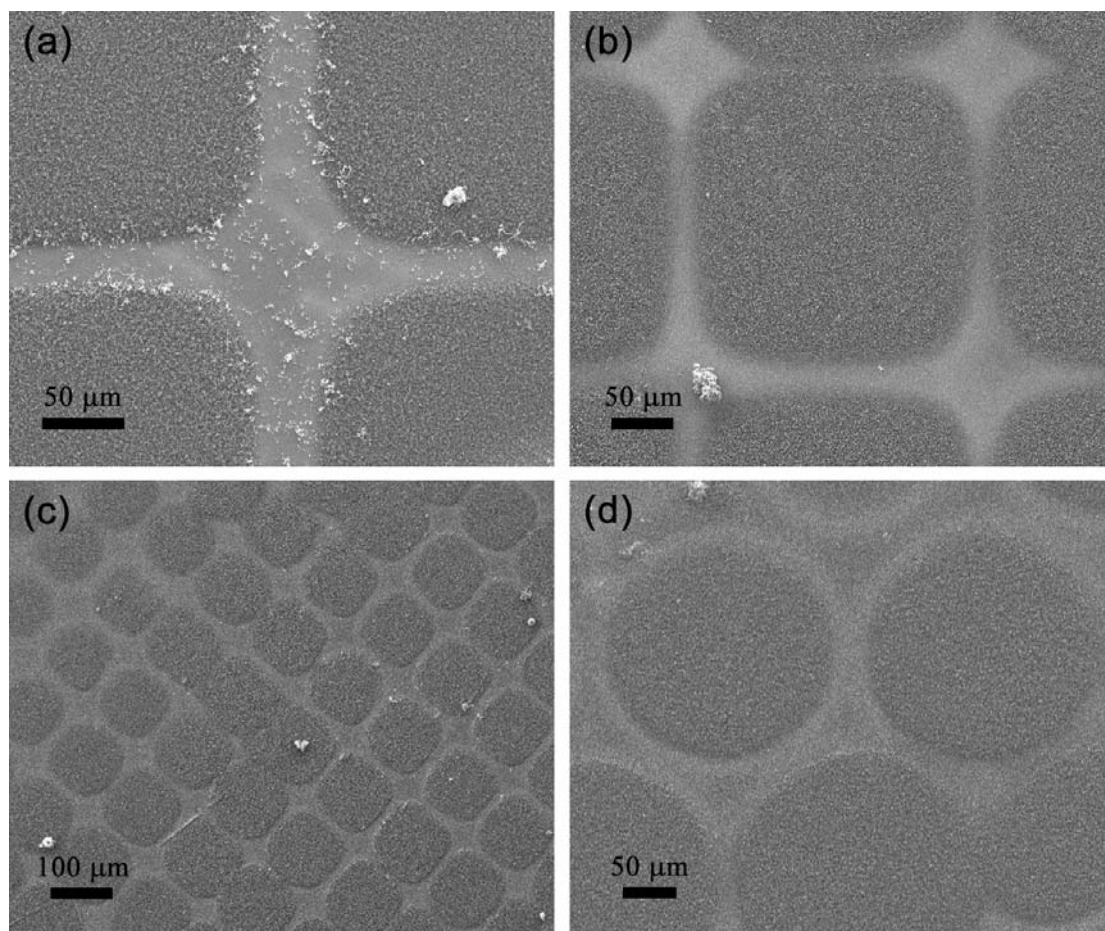

**Fig. S3** The results of the CNT growth under different masks: (a) Cu grid; (b) Fe grid; (c) W grid; (d) Ni grid. The growth of CNTs in the covered area was limited.

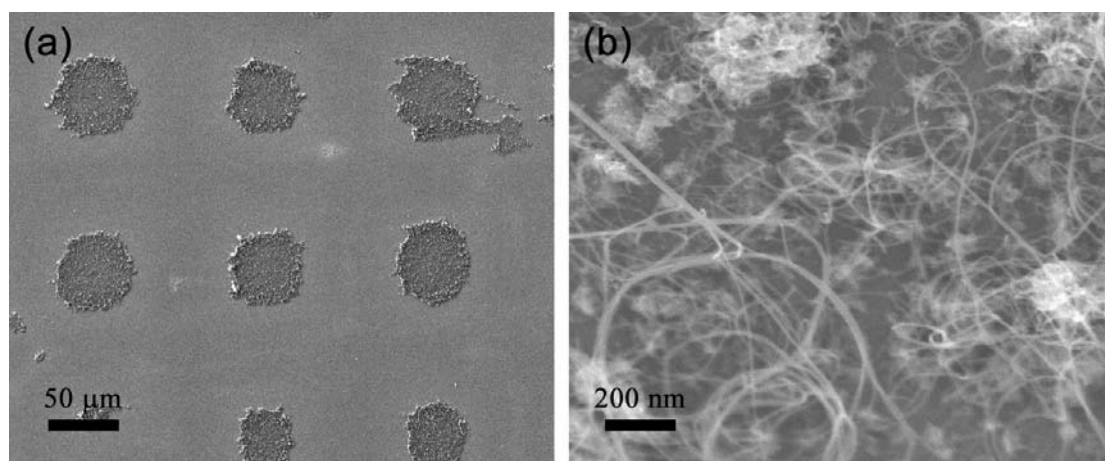

**Fig. S4** (a) the SEM image of the silicon substrate after the removal of CNT architectures in Fig. 2d. The black dots in the image referred to the uncovered area; (b) the enlarged SEM image of the uncovered area, showing the formation of a sparse CNT film.
